# Supplementary material for: Condensation of Ded1p Promotes a Translational Switch from Housekeeping to Stress Protein Production
Source: PubMed Central journal article supplement — Cell. 2020 May 14;181(4):818–831.e19. doi: 10.1016/j.cell.2020.04.009 (PMC7237889; doi:10.1016/j.cell.2020.04.009), 2020-05-14
Supplement: mmc1.pdf [file mmc1.pdf]

## **Supplemental Information**

### **Condensation of Ded1p Promotes a Translational Switch from Housekeeping to Stress Protein Production**

**Christiane Iserman, Christine Desroches Altamirano, Ceciel Jegers, Ulrike Friedrich, Taraneh Zarin, Anatol W. Fritsch, Matthäus Mittasch, Antonio Domingues, Lena Hersemann, Marcus Jahnel, Doris Richter, Ulf-Peter Guenther, Matthias W. Hentze, Alan M. Moses, Anthony A. Hyman, Günter Kramer, Moritz Kreysing, Titus M. Franzmann, and Simon Alberti**

**Table S1: Overview of 5'UTR characteristics of differentially translated genes. Related to Figures 1 and 6 and Figures S1 and S6.** Median and means of PARS scores, calculated MFEs and length of all known yeast 5'UTRs in comparison to the PARS scores, calculated MFEs and length of 5'UTRs of differentially translated genes between wildtype Ded1p and Ded1-IDR<sub>m</sub> at 30°C, 40°C and 42°C. Significance of differences between the conditions were determined using a two-sided Wilcoxon test.

| comparison      | PARS adj p value | PARS mean | PARS median | gene count* | MFE adj p value | MFE mean | MFE median | length adj p value | length mean | length median | gene count** |
|-----------------|------------------|-----------|-------------|-------------|-----------------|----------|------------|--------------------|-------------|---------------|--------------|
| All genes       |                  | 7.78      | 3.77        | 2674        |                 | -11.41   | -5.00      |                    | 81          | 53            | 4358         |
| WT_40_<_WT_42   | 0.868            | 6.56      | 6.84        | 99          | 3.93E-06        | -6.32    | -1.61      | 8.46E-07           | 53          | 34            | 118          |
| WT_40_>_WT_42   | 3.68E-04         | 20.84     | 10.00       | 177         | 8.19E-04        | -17.11   | -7.10      | 2.29E-10           | 123         | 78            | 240          |
| WT_40_<_IDRm_40 | 0.934            | 13.89     | 3.01        | 71          | 0.659           | -12.31   | -5.50      | 0.059              | 100         | 64            | 93           |
| WT_40_>_IDRm_40 | 0.064            | 14.14     | 8.44        | 96          | 0.002           | -17.30   | -8.40      | 2.67E-04           | 110         | 72            | 110          |
| WT_42_<_IDRm_42 | 0.209            | 11.45     | 6.93        | 138         | 0.091           | -10.88   | -3.79      | 0.482              | 89          | 55            | 235          |
| WT_42_>_IDRm_42 | 0.009            | 15.15     | 6.34        | 190         | 3.59E-06        | -14.84   | -9.30      | 4.01E-05           | 96          | 74            | 249          |

\* the gene count corresponds to the number of genes differentially expressed for which the PARS score was experimentally determined.

\*\* the gene count corresponds to the number of genes differentially expressed for which the 5'UTR sequence is known.

**Table S2: Overview of *in vitro* translation assay reporter transcripts. Related to Figure 6.** The likelihood of an mRNA to fold was measured with the program RNAfold from the ViennaRNA Package (Lorenz et al., 2011) by calculating the minimum free energy and the partition function. The more negative the free energy for a given RNA, the more likely it is to be folded. The *GIS2* 5'UTR was used as the unstructured baseline control for the *in vitro* translation assays. The “high” Ded1p induction is defined as a greater than 10-fold increase in the translation of the respective mRNA upon addition of 0.8  $\mu$ M Ded1p in the *in vitro* translation reaction after 90 minutes. A “low” induction is defined as a less than 10-fold increase in the *in vitro* translation of the respective mRNA.

| Gene                 | Description                       | Minimum free energy (kcal/mol) | Ensemble free energy (kcal/mol) | Centroid free energy (kcal/mol) | 5'UTR length (nt) | Ded1p induction |
|----------------------|-----------------------------------|--------------------------------|---------------------------------|---------------------------------|-------------------|-----------------|
| <b><i>GIS2</i></b>   | IRES activator                    | 0                              | 0                               | 0                               | 14                | Low             |
| <b><i>HSP12</i></b>  | Heat induced small Hsp            | 0                              | -0.01                           | 0                               | 39                | Low             |
| <b><i>HSP104</i></b> | Heat induced disaggregase         | 0                              | -0.4                            | 0                               | 40                | Low             |
| <b><i>SSA4</i></b>   | Heat induced Hsp70                | 0                              | -0.38                           | 0                               | 55                | Low             |
| <b><i>DED1</i></b>   | RNA helicase                      | -0.8                           | -1.13                           | -0.8                            | 21                | Low             |
| <b><i>SSA1</i></b>   | Housekeeping Hsp70                | -2.7                           | -3.95                           | -0.3                            | 64                | High            |
| <b><i>SBE22</i></b>  | Involved in bud growth            | -12.84                         | -13.72                          | -12.84                          | 81                | High            |
| <b><i>PAB1</i></b>   | Poly(A)-binding protein           | -12.5                          | -15.46                          | -9.3                            | 133               | High            |
| <b><i>SSK2</i></b>   | MAPKKK of HOG1 signaling pathway. | -16.83                         | -19.55                          | -4.18                           | 98                | High            |

**Table S3: Overview of the maximum growth temperature of fungi species and  $T_{\text{onset}}$  for Ded1p phase separation. Related for Figure 7. The  $T_{\text{onset}}$  of purified Ded1p homologues was assessed using DLS.**

| <b>Species</b>              | <b>Max. growth temperature (°C)</b> | <b><math>T_{\text{onset}}</math> (°C)</b> |
|-----------------------------|-------------------------------------|-------------------------------------------|
| <i>S. kudriavzevii</i>      | 36 (Salvadó et al., 2011)           | 34                                        |
| <i>S. cerevisiae</i> (W303) | 42 (Observation, growth on plates)  | 40                                        |
| <i>T. terrestris</i>        | 50 (Samson et al., 1977)            | 46                                        |
